# Supplementary material for: Diagnostic yield of pediatric and prenatal exome sequencing in a diverse population
Source: PubMed Central journal article supplement (PMC10220040; doi:10.1038/s41525-023-00353-0), 2023-05-26
Supplement: 41525_2023_353_MOESM1_ESM.pdf [file 41525_2023_353_MOESM1_ESM.pdf]

**Supplementary table 1. Age at Enrollment, Diagnostic Yield and Inconclusive Rate for Pediatric Patients**

| <b>Proband age at enrollment</b> | <b>n</b>           | <b>Positive</b> | <b>Inconclusive</b> | <b>Negative</b> |
|----------------------------------|--------------------|-----------------|---------------------|-----------------|
| Newborn to up to 1 year old      | 86 (.163)          | 24 (.279)       | 15 (.174)           | 47 (.547)       |
| 1-2 years old                    | 97 (.183)          | 25 (.258)       | 12 (.126)           | 59 (.621)       |
| 3-5 years old                    | 112 (.212)         | 26 (.232)       | 14 (.125)           | 72 (.643)       |
| 6-10 years old                   | 110 (.208)         | 32 (.291)       | 16 (.145)           | 62 (.564)       |
| 11-15 years old                  | 93 (.176)          | 24 (.258)       | 10 (.108)           | 59 (.634)       |
| 16-25 years old                  | 31 (.059)          | 10 (.323)       | 7 (.226)            | 14 (.452)       |
| <b>Total</b>                     | <b>529 (1.000)</b> |                 |                     |                 |

**Supplementary table 2. Pregnancy Outcomes, Diagnostic Yield and Inconclusive Rate for Prenatal Patients**

| <b>Pregnancy outcome</b>    | <b>n</b>           | <b>Positive</b> | <b>Inconclusive</b> | <b>Negative</b> |
|-----------------------------|--------------------|-----------------|---------------------|-----------------|
| Stillbirth (>20 weeks)      | 19 (.064)          | 2 (.105)        | 1 (.053)            | 16 (.842)       |
| Living child                | 122 (.380)         | 10 (.082)       | 10 (.082)           | 102 (.936)      |
| Neonatal/living child death | 33 (.105)          | 9 (.273)        | 3 (.091)            | 21 (.636)       |
| Pregnancy termination       | 135 (.427)         | 37 (.274)       | 5 (.037)            | 93 (.689)       |
| Miscarriage (<20 weeks)     | 7 (.022)           | 2 (.286)        | 1 (.143)            | 4 (.571)        |
| <b>Total</b>                | <b>316 (1.000)</b> |                 |                     |                 |

**Supplementary table 3. Diagnostic Yield (Proportion Positive) and Inconclusive Rate by Mode of Inheritance, Sequencing Approach and Sex of Proband for Pediatric Patients**

| Result type                         |                                   | Quad<br>(n = 19) | Trio<br>(n = 326) | Duo<br>(n = 108) | Proband<br>first<br>(n = 76) | Female<br>(n = 239) | Male<br>(n = 290) | Total<br>(n = 529) |
|-------------------------------------|-----------------------------------|------------------|-------------------|------------------|------------------------------|---------------------|-------------------|--------------------|
| <b>Definitive positive</b>          | Mode of inheritance               |                  |                   |                  |                              |                     |                   |                    |
|                                     | AD <sup>1</sup> , <i>de novo</i>  | 1 (.053)         | 46 (.141)         | 1 (.009)         | 5 (.066)                     | 25 (.105)           | 28 (.097)         | 53 (.100)          |
|                                     | AD, inherited                     | 3 (.157)         | 5 (.015)          | 0 (.000)         | 0 (.000)                     | 4 (.017)            | 4 (.014)          | 8 (.015)           |
|                                     | AD, segregation unknown           | 0 (.000)         | 0 (.000)          | 6 (.056)         | 2 (.026)                     | 2 (.008)            | 6 (.021)          | 8 (.015)           |
|                                     | AR <sup>2</sup> , HZ <sup>3</sup> | 1 (.053)         | 6 (.018)          | 2 (.019)         | 1 (.013)                     | 7 (.029)            | 3 (.010)          | 10 (.019)          |
|                                     | AR, comp. het. <sup>4</sup>       | 0 (.000)         | 4 (.012)          | 0 (.000)         | 1 (.013)                     | 2 (.008)            | 3 (.010)          | 5 (.009)           |
|                                     | X-linked                          | 0 (.000)         | 11 (.034)         | 1 (.009)         | 0 (.000)                     | 10 (.042)           | 2 (.007)          | 12 (.022)          |
|                                     | All                               | 5 (.263)         | 72 (.221)         | 10 (.093)        | 9 (.118)                     | 50 (.209)           | 46 (.159)         | 96 (.181)          |
| <b>Probable positive</b>            | Mode of inheritance               |                  |                   |                  |                              |                     |                   |                    |
|                                     | AD <i>de novo</i>                 | 0 (.000)         | 11 (.034)         | 0 (.000)         | 3 (.039)                     | 10 (.042)           | 4 (.014)          | 14 (.026)          |
|                                     | AD inherited                      | 0 (.000)         | 3 (.009)          | 2 (.019)         | 1 (.013)                     | 3 (.013)            | 3 (.010)          | 6 (.011)           |
|                                     | AD unknown                        | 0 (.000)         | 0 (.000)          | 8 (.074)         | 1 (.013)                     | 3 (.013)            | 6 (.021)          | 9 (.017)           |
|                                     | AR HZ                             | 0 (.000)         | 3 (.009)          | 1 (.009)         | 0 (.000)                     | 3 (.013)            | 1 (.003)          | 4 (.008)           |
|                                     | AR comp het                       | 0 (.000)         | 2 (.006)          | 4 (.037)         | 0 (.000)                     | 5 (.021)            | 1 (.003)          | 6 (.011)           |
|                                     | X-linked                          | 0 (.000)         | 3 (.009)          | 2 (.019)         | 1 (.013)                     | 3 (.013)            | 3 (.010)          | 6 (.011)           |
|                                     | All                               | 0 (.000)         | 22 (.067)         | 17 (.157)        | 6 (.079)                     | 27 (.113)           | 18 (.062)         | 45 (.085)          |
| <b>Definitive/probable positive</b> | Mode of inheritance               |                  |                   |                  |                              |                     |                   |                    |
|                                     | AD <i>de novo</i>                 | 1 (.053)         | 57 (.175)         | 1 (.009)         | 8 (.105)                     | 35 (.146)           | 32 (.110)         | 67 (.127)          |
|                                     | AD inherited                      | 3 (.157)         | 8 (.025)          | 2 (.019)         | 1 (.013)                     | 7 (.029)            | 7 (.024)          | 14 (.026)          |
|                                     | AD unknown                        | 0 (.000)         | 0 (.000)          | 14 (.13)         | 3 (.039)                     | 5 (.021)            | 12 (.041)         | 17 (.032)          |
|                                     | AR HZ                             | 1 (.053)         | 9 (.028)          | 3 (.028)         | 1 (.013)                     | 10 (.042)           | 4 (.014)          | 14 (.026)          |
|                                     | AR comp het                       | 0 (.000)         | 6 (.018)          | 4 (.037)         | 1 (.013)                     | 7 (.029)            | 4 (.014)          | 11 (.021)          |
|                                     | X-linked                          | 0 (.000)         | 14 (.043)         | 3 (.028)         | 1 (.013)                     | 13 (.054)           | 5 (.017)          | 18 (.034)          |
|                                     | All                               | 5 (.263)         | 94 (.288)         | 27 (.25)         | 15 (.197)                    | 77 (.322)           | 64 (.221)         | 141 (.267)         |
| <b>Inconclusive</b>                 | Mode of inheritance               |                  |                   |                  |                              |                     |                   |                    |
|                                     | AD <i>de novo</i>                 | 0 (.000)         | 10 (.031)         | 0 (.000)         | 1 (.013)                     | 6 (.025)            | 5 (.017)          | 11 (.021)          |
|                                     | AD inherited                      | 0 (.000)         | 7 (.021)          | 2 (.019)         | 2 (.026)                     | 4 (.017)            | 7 (.024)          | 11 (.021)          |
|                                     | AD unknown                        | 0 (.000)         | 1 (.003)          | 7 (.065)         | 0 (.000)                     | 4 (.017)            | 4 (.014)          | 8 (.015)           |
|                                     | AR HZ                             | 1 (.053)         | 17 (.052)         | 5 (.046)         | 1 (.013)                     | 9 (.038)            | 15 (.052)         | 24 (.045)          |
|                                     | AR comp het                       | 0 (.000)         | 5 (.015)          | 4 (.037)         | 0 (.000)                     | 5 (.021)            | 4 (.014)          | 9 (.017)           |
|                                     | X-linked                          | 0 (.000)         | 9 (.028)          | 2 (.019)         | 0 (.000)                     | 4 (.017)            | 7 (.024)          | 11 (.021)          |
|                                     | All                               | 1 (.053)         | 49 (.150)         | 20 (.185)        | 4 (.053)                     | 32 (.134)           | 42 (.145)         | 74 (.140)          |
| <b>Negative</b>                     |                                   | 13 (.684)        | 183 (.561)        | 61 (.565)        | 57 (.75)                     | 130 (.544)          | 184 (.634)        | 314 (.594)         |

AD<sup>1</sup> = autosomal dominant; AR<sup>2</sup> = autosomal recessive; HZ<sup>3</sup> = homozygous; comp. het.<sup>4</sup> = compound heterozygous.

**Supplementary table 4. Diagnostic Yield (Proportion Positive) and Inconclusive Rate by Mode of Inheritance, Sequencing Approach and Sex of Proband for Prenatal Patients**

|                                     |                                   | Quad*<br>(n = 12) | Trio<br>(n = 257) | Duo<br>(n = 14) | Proband<br>first<br>(n = 33) | Female<br>(n = 145) | Male<br>(n = 171) | Total<br>(n = 316) |
|-------------------------------------|-----------------------------------|-------------------|-------------------|-----------------|------------------------------|---------------------|-------------------|--------------------|
| <b>Definitive positive</b>          | <b>Mode of inheritance</b>        |                   |                   |                 |                              |                     |                   |                    |
|                                     | AD <sup>1</sup> , <i>de novo</i>  | 0 (.000)          | 26 (.101)         | 1 (.071)        | 1 (.030)                     | 11 (.076)           | 17 (.099)         | 28 (.089)          |
|                                     | AD, inherited                     | 0 (.000)          | 0 (.000)          | 0 (.000)        | 1 (.030)                     | 1 (.007)            | 0 (.000)          | 1 (.003)           |
|                                     | AD, segregation unknown           | 0 (.000)          | 0 (.000)          | 1 (.071)        | 0 (.000)                     | 0 (.000)            | 1 (.006)          | 1 (.003)           |
|                                     | AR <sup>2</sup> , HZ <sup>3</sup> | 0 (.000)          | 2 (.008)          | 0 (.000)        | 0 (.000)                     | 1 (.007)            | 1 (.006)          | 2 (.006)           |
|                                     | AR, comp. het. <sup>4</sup>       | 0 (.000)          | 1 (.004)          | 0 (.000)        | 3 (.091)                     | 2 (.014)            | 2 (.012)          | 4 (.013)           |
|                                     | X-linked                          | 0 (.000)          | 3 (.012)          | 0 (.000)        | 0 (.000)                     | 2 (.014)            | 1 (.006)          | 3 (.009)           |
|                                     | All                               | 0 (.000)          | 32 (.125)         | 2 (.143)        | 5 (.152)                     | 17 (.117)           | 22 (.129)         | 39 (.123)          |
| <b>Probable positive</b>            | <b>Mode of inheritance</b>        |                   |                   |                 |                              |                     |                   |                    |
|                                     | AD <i>de novo</i>                 | 0 (.000)          | 6 (.023)          | 0 (.000)        | 0 (.000)                     | 3 (.021)            | 3 (.018)          | 6 (.019)           |
|                                     | AD inherited                      | 0 (.000)          | 3 (.012)          | 0 (.000)        | 0 (.000)                     | 1 (.007)            | 2 (.012)          | 3 (.009)           |
|                                     | AD unknown                        | 0 (.000)          | 0 (.000)          | 0 (.000)        | 0 (.000)                     | 0 (.000)            | 0 (.000)          | 0 (.000)           |
|                                     | AR HZ                             | 2 (.167)          | 0 (.000)          | 0 (.000)        | 0 (.000)                     | 0 (.000)            | 2 (.012)          | 2 (.006)           |
|                                     | AR comp het                       | 0 (.000)          | 4 (.016)          | 0 (.000)        | 3 (.091)                     | 5 (.034)            | 2 (.012)          | 7 (.022)           |
|                                     | X-linked                          | 0 (.000)          | 3 (.012)          | 0 (.000)        | 0 (.000)                     | 0 (.000)            | 3 (.018)          | 3 (.009)           |
|                                     | All                               | 2 (.167)          | 16 (.062)         | 0 (.000)        | 3 (.091)                     | 9 (.062)            | 12 (.070)         | 21 (.066)          |
| <b>Definitive/probable positive</b> | <b>Mode of inheritance</b>        |                   |                   |                 |                              |                     |                   |                    |
|                                     | AD <i>de novo</i>                 | 0 (.000)          | 32 (.125)         | 1 (.071)        | 1 (.030)                     | 14 (.097)           | 20 (.117)         | 34 (.108)          |
|                                     | AD inherited                      | 0 (.000)          | 3 (.012)          | 0 (.000)        | 1 (.030)                     | 2 (.014)            | 2 (.012)          | 4 (.013)           |
|                                     | AD unknown                        | 0 (.000)          | 0 (.000)          | 1 (.071)        | 0 (.000)                     | 0 (.000)            | 1 (.006)          | 1 (.003)           |
|                                     | AR HZ                             | 2 (.167)          | 2 (.008)          | 0 (.000)        | 0 (.000)                     | 1 (.007)            | 3 (.018)          | 4 (.013)           |
|                                     | AR comp het                       | 0 (.000)          | 5 (.019)          | 0 (.000)        | 6 (.182)                     | 7 (.048)            | 4 (.023)          | 11 (.035)          |
|                                     | X-linked                          | 0 (.000)          | 6 (.023)          | 0 (.000)        | 0 (.000)                     | 2 (.014)            | 4 (.023)          | 6 (.019)           |
|                                     | All                               | 2 (.167)          | 48 (.187)         | 2 (.143)        | 8 (.242)                     | 26 (.179)           | 34 (.199)         | 60 (.190)          |
| <b>Inconclusive</b>                 | <b>Mode of inheritance</b>        |                   |                   |                 |                              |                     |                   |                    |
|                                     | AD <i>de novo</i>                 | 1 (.083)          | 5 (.019)          | 0 (.000)        | 0 (.000)                     | 5 (.034)            | 1 (.006)          | 6 (.019)           |
|                                     | AD inherited                      | 0 (.000)          | 4 (.016)          | 0 (.000)        | 0 (.000)                     | 0 (.000)            | 4 (.023)          | 4 (.013)           |
|                                     | AD unknown                        | 0 (.000)          | 1 (.004)          | 1 (.071)        | 0 (.000)                     | 1 (.007)            | 1 (.006)          | 2 (.006)           |
|                                     | AR HZ                             | 0 (.000)          | 2 (.008)          | 0 (.000)        | 1 (.030)                     | 2 (.014)            | 1 (.006)          | 3 (.009)           |
|                                     | AR comp het                       | 0 (.000)          | 2 (.008)          | 0 (.000)        | 1 (.030)                     | 0 (.000)            | 3 (.018)          | 3 (.009)           |
|                                     | X-linked                          | 0 (.000)          | 2 (.008)          | 0 (.000)        | 0 (.000)                     | 0 (.000)            | 2 (.012)          | 2 (.006)           |
|                                     | All                               | 1 (.083)          | 16 (.062)         | 1 (.071)        | 2 (.061)                     | 8 (.055)            | 12 (.070)         | 20 (.063)          |
| <b>Negative</b>                     |                                   | 9 (.750)          | 193 (.751)        | 11 (.786)       | 23 (.697)                    | 111 (.765)          | 125 (.730)        | 236 (.747)         |

\*One quintet included in Quads. AD<sup>1</sup> = autosomal dominant; AR<sup>2</sup> = autosomal recessive; HZ<sup>3</sup> = homozygous; comp. het.<sup>4</sup> = compound heterozygous.

**Supplementary table 5. Diagnostic Yield (Proportion Positive) and Inconclusive Rate by Number of Underrepresented Minority (URM) Parents for Pediatric and Prenatal Patients**

|                     | 2 URM      | 1 URM, 1 Not | 1 URM, 1 ? | ≥1 URM     | 2 Not     | 1 Not, 1? | 2 ?       |
|---------------------|------------|--------------|------------|------------|-----------|-----------|-----------|
| <b>Pediatric</b>    |            |              |            |            |           |           |           |
| Definitive Positive | 51 (.171)  | 11 (.196)    | 6 (.162)   | 68 (.173)  | 12 (.185) | 1 (.111)  | 15 (.238) |
| Probable Positive   | 24 (.080)  | 5 (.089)     | 5 (.135)   | 34 (.087)  | 6 (.092)  | 0 (.000)  | 5 (.079)  |
| All Positive        | 75 (.251)  | 16 (.286)    | 11 (.297)  | 102 (.260) | 18 (.277) | 1 (.111)  | 20 (.317) |
| Inconclusive        | 43 (.144)  | 10 (.179)    | 4 (.108)   | 57 (.145)  | 6 (.092)  | 2 (.222)  | 9 (.143)  |
| Negative            | 181 (.605) | 30 (.536)    | 22 (.595)  | 233 (.594) | 41 (.631) | 6 (.667)  | 34 (.540) |
| Total               | 299        | 56           | 37         | 392        | 65        | 9         | 63        |
| <b>Prenatal</b>     |            |              |            |            |           |           |           |
| Definitive Positive | 9 (.083)   | 6 (.133)     | 2 (.200)   | 17 (.104)  | 9 (.099)  | 3 (.250)  | 10 (.200) |
| Probable Positive   | 5 (.046)   | 4 (.089)     | 0 (.000)   | 9 (.055)   | 5 (.055)  | 2 (.167)  | 5 (.100)  |
| All Positive        | 14 (.130)  | 10 (.222)    | 2 (.200)   | 26 (.160)  | 14 (.154) | 5 (.417)  | 15 (.300) |
| Inconclusive        | 10 (.093)  | 1 (.022)     | 0 (.000)   | 11 (.067)  | 3 (.033)  | 2 (.167)  | 4 (.080)  |
| Negative            | 84 (.778)  | 34 (.756)    | 8 (.800)   | 126 (.773) | 74 (.813) | 5 (.417)  | 31 (.620) |
| Total               | 108        | 45           | 10         | 163        | 91        | 12        | 50        |

URM=underrepresented minority parent; Not=white parent; ? = race/ethnicity missing

**Supplementary table 6. Diagnostic Yield (Proportion Positive) and Inconclusive Rate by Underserved and Underrepresented Minority Status for Pediatric and Prenatal Patients**

|                     | US         | Not US     | US, URM    | US, Not URM | US, URM?  | Not US, URM | Not US, Not URM | Not US, URM? |
|---------------------|------------|------------|------------|-------------|-----------|-------------|-----------------|--------------|
| <b>Pediatric</b>    |            |            |            |             |           |             |                 |              |
| Definitive Positive | 80 (.175)  | 16 (.222)  | 61 (.167)  | 8 (.216)    | 11 (.200) | 7 (.219)    | 5 (.172)        | 4 (.364)     |
| Probable Positive   | 38 (.083)  | 7 (.097)   | 31 (.085)  | 1 (.027)    | 6 (.109)  | 2 (.063)    | 5 (.172)        | 0 (.000)     |
| All Positive        | 118 (.258) | 23 (.319)  | 92 (.252)  | 9 (.243)    | 17 (.309) | 9 (.281)    | 10 (.345)       | 4 (.364)     |
| Inconclusive        | 68 (.149)  | 6 (.083)   | 56 (.153)  | 4 (.108)    | 8 (.145)  | 4 (.125)    | 1 (.034)        | 1 (.091)     |
| Negative            | 271 (.593) | 43 (.597)  | 217 (.595) | 24 (.6490)  | 30 (.545) | 19 (.594)   | 18 (.621)       | 6 (.545)     |
| Total               | 457        | 72         | 365        | 37          | 55        | 32          | 29              | 11           |
| <b>Prenatal</b>     |            |            |            |             |           |             |                 |              |
| Definitive Positive | 20 (.137)  | 19 (.112)  | 8 (.100)   | 5 (.167)    | 7 (.194)  | 10 (.128)   | 5 (.086)        | 4 (.118)     |
| Probable Positive   | 6 (.041)   | 15 (.088)  | 4 (.050)   | 1 (.033)    | 1 (.028)  | 5 (.064)    | 3 (.052)        | 7 (.206)     |
| All Positive        | 26 (.178)  | 34 (.200)  | 12 (.150)  | 6 (.200)    | 8 (.222)  | 15 (.192)   | 8 (.138)        | 11 (.324)    |
| Inconclusive        | 11 (.075)  | 9 (.053)   | 6 (.075)   | 1 (.033)    | 4 (.111)  | 6 (.077)    | 2 (.034)        | 1 (.029)     |
| Negative            | 109 (.747) | 127 (.747) | 62(.775)   | 23 (.767)   | 24 (.667) | 57 (.731)   | 48 (.828)       | 22 (.647)    |
| Total               | 146        | 170        | 80         | 30          | 36        | 78          | 58              | 34           |

**Supplementary table 7. Parental Age at Conception According to Variant Type and Inheritance (years, with fraction of years)**

| Variant type                                                 | Pediatric |        | Prenatal |        |
|--------------------------------------------------------------|-----------|--------|----------|--------|
|                                                              | Mother    | Father | Mother   | Father |
| -                                                            |           |        |          |        |
| <b>Autosomal dominant, <i>de novo</i></b>                    | 30.8      | 35.3   | 33.2     | 35.3   |
| <b>Other inherited variants, excluding X-linked variants</b> | 28.4      | 32.3   | 30.4     | 32.1   |
| <b>Negative</b>                                              | 28.5      | 32.1   | 32.8     | 35.20  |

**Supplementary table 8. Variant Type in Patients with Definitive Positive, Probable Positive and Inconclusive Results for both Pediatric and Prenatal Patients**

|                   | <b>Definitive positive</b> | <b>%</b> | <b>Probable positive</b> | <b>%</b> | <b>Inconclusive</b> | <b>%</b> |
|-------------------|----------------------------|----------|--------------------------|----------|---------------------|----------|
| Frameshift        | 38                         | 27.0     | 15                       | 19.5     | 9                   | 9.7      |
| Stop-gain/loss    | 42                         | 29.8     | 11                       | 14.3     | 7                   | 7.5      |
| Missense          | 50                         | 35.5     | 43                       | 55.8     | 67                  | 72.0     |
| In-frame deletion | 2                          | 1.4      | 1                        | 1.3      | 3                   | 3.2      |
| Splice-site       | 9                          | 6.4      | 7                        | 9.1      | 7                   | 7.5      |
| Total             | 141                        | 100.0    | 77                       | 100.0    | 93                  | 100.0    |



**Supplementary table 9. Results of Multinomial Regression Analysis**

**A. Definitive Positive vs Negative**

|                                       | Beta    | Standard error | P-value |
|---------------------------------------|---------|----------------|---------|
| (Intercept)                           | -2.6    | 0.86           | 0.0026  |
| Self-identified URM = True            | -0.029  | 0.33           | 0.93    |
| Self-identified URM = Unknown         | -0.063  | 0.78           | 0.94    |
| Prenatal case = True                  | -0.97   | 0.31           | 0.0019  |
| Sex = Male                            | 0.33    | 0.24           | 0.16    |
| Samples run = 1 vs. 3                 | -0.51   | 0.45           | 0.26    |
| Samples run = 2 vs. 3                 | -0.015  | 0.61           | 0.98    |
| Samples run = 4 vs. 3                 | -0.47   | 0.58           | 0.42    |
| Maternal age (years)                  | -0.0099 | 0.028          | 0.73    |
| Paternal age (years)                  | 0.053   | 0.021          | 0.011   |
| Maternal education = 2                | -0.36   | 0.35           | 0.3     |
| Maternal education = 3                | -0.12   | 0.38           | 0.75    |
| Household language = Other            | -0.28   | 0.35           | 0.43    |
| Household language = English or Other | -0.37   | 0.37           | 0.31    |
| Insurance = Public                    | 0.24    | 0.35           | 0.5     |
| MUA = True                            | 0.64    | 0.27           | 0.019   |
| HPSA = True                           | -0.62   | 0.36           | 0.083   |
| Underserved resident = True           | 0.45    | 0.45           | 0.31    |

**B. Probable Positive vs Negative**

|                                       | Beta    | Standard error | P-value |
|---------------------------------------|---------|----------------|---------|
| (Intercept)                           | -2.9    | 1.3            | 0.022   |
| Self-identified URM = True            | -0.21   | 0.49           | 0.67    |
| Self-identified URM = Unknown         | 1.7     | 0.77           | 0.027   |
| Prenatal case = True                  | -0.85   | 0.45           | 0.061   |
| Sex = Male                            | 0.49    | 0.34           | 0.15    |
| Samples run = 1 vs. 3                 | 0.019   | 0.55           | 0.97    |
| Samples run = 2 vs. 3                 | 1       | 0.64           | 0.1     |
| Samples run = 4 vs. 3                 | -0.6    | 1.1            | 0.57    |
| Maternal age (years)                  | 0.034   | 0.043          | 0.43    |
| Paternal age (years)                  | -0.0065 | 0.036          | 0.86    |
| Maternal education = 2                | 0.24    | 0.52           | 0.65    |
| Maternal education = 3                | -0.06   | 0.54           | 0.91    |
| Household language = Other            | 0.75    | 0.51           | 0.14    |
| Household language = English or Other | -0.065  | 0.57           | 0.91    |
| Insurance = Public                    | -0.15   | 0.52           | 0.77    |
| MUAP = True                           | -0.77   | 0.53           | 0.15    |
| HPSA = True                           | -0.55   | 0.55           | 0.36    |
| Underserved resident = True           | -1      | 1.1            | 0.35    |

### C. Inconclusive vs Negative

|                                       | Beta    | Standard error | P-value |
|---------------------------------------|---------|----------------|---------|
| (Intercept)                           | -0.75   | 1.1            | 0.49    |
| Self-identified URM = True            | 0.82    | 0.54           | 0.12    |
| Self-identified URM = Unknown         | 1.0     | 1.2            | 0.4     |
| Prenatal case = True                  | -0.85   | 0.4            | 0.035   |
| Sex = Male                            | 0.28    | 0.29           | 0.33    |
| Samples run = 1 vs. 3                 | -1.2    | 0.76           | 0.11    |
| Samples run = 2 vs. 3                 | 0.8     | 0.52           | 0.13    |
| Samples run = 4 vs. 3                 | -0.49   | 0.78           | 0.53    |
| Maternal age (years)                  | -0.036  | 0.037          | 0.34    |
| Paternal age (years)                  | -0.014  | 0.031          | 0.65    |
| Maternal education = high school      | -0.19   | 0.38           | 0.61    |
| Maternal education = college          | -0.15   | 0.43           | 0.74    |
| Household language = Other            | -0.86   | 0.43           | 0.046   |
| Household language = English or Other | 0.34    | 0.36           | 0.34    |
| Insurance = Public                    | 0.38    | 0.46           | 0.4     |
| MUAP = True                           | -0.0063 | 0.36           | 0.99    |
| HPSA = True                           | -0.37   | 0.4            | 0.35    |
| Underserved resident = True           | -0.82   | 0.7            | 0.24    |

**Supplementary table 10. Race/Ethnicity Distribution of P<sup>3</sup>EGS Cases Versus UCSF Pediatric Genetics Clinics and Obstetrics/Gynecology Clinics\***

|                       | Pediatric          |         | Prenatal           |         |
|-----------------------|--------------------|---------|--------------------|---------|
|                       | P <sup>3</sup> EGS | Clinics | P <sup>3</sup> EGS | Clinics |
| Hispanic              | .48                | .34     | .20                | .20     |
| Asian                 | .12                | .11     | .19                | .15     |
| Black/African America | .05                | .05     | .01                | .04     |
| Native American       | .01                | .01     | <.01               | <.01    |
| Pacific Islander      | .01                | .01     | <.01               | .05     |
| White                 | .22                | .37     | .47                | .47     |
| Multiple/Other        | .10                | .11     | .13                | .08     |

\*Excluding those with missing race/ethnicity information; averaging P<sup>3</sup>EGS parents

**Supplementary table 11. Geographic Distribution (by California County) of P<sup>3</sup>EGS Cases Versus UCSF Pediatric Genetics Clinics and Obstetrics/Gynecology Clinics for California Cases**

|               | Pediatric          |         | Prenatal           |         |
|---------------|--------------------|---------|--------------------|---------|
|               | P <sup>3</sup> EGS | Clinics | P <sup>3</sup> EGS | Clinics |
| Alameda       | .08                | .07     | .04                | .04     |
| Contra Costa  | .24                | .23     | .19                | .11     |
| Fresno        | .06                | .02     | .07                | <.01    |
| Marin         | .07                | .08     | .05                | .16     |
| Mendocino     | .09                | .09     | .03                | .11     |
| Monterey      | .02                | .02     | .02                | .09     |
| Sacramento    | .01                | <.01    | .02                | <.01    |
| San Francisco | .14                | .16     | .18                | .22     |
| San Joaquin   | .08                | .05     | .02                | <.01    |
| San Mateo     | .03                | .05     | .09                | .10     |
| Santa Clara   | <.01               | .01     | .06                | .01     |
| Santa Cruz    | <.01               | .01     | .03                | .01     |
| Stanislaus    | .08                | .06     | .06                | .01     |
| Tulare        | .02                | .01     | .03                | <.01    |
| Other         | .07                | .14     | .11                | .13     |

**Supplementary Table 12. Enrollment Criteria for Program in Prenatal and Pediatric Genomic Sequencing (P<sup>3</sup>EGS)**

**Inclusion Criteria**

1. Presenting clinical features suggestive of a genetic etiology, including ID<sup>a</sup>, seizures, multiple congenital anomalies, metabolic conditions, and neurodegenerative conditions or idiopathic CP<sup>b</sup>; up to 80 of these patients will have encephalopathy or multiple congenital anomalies so that they may benefit from rapid exome sequencing in the Pediatric Intensive Care Unit or Neonatal Intensive Care Unit.
2. Pregnant women with fetuses with structural birth defects identified by ultrasound.
3. A minimum of one biological parent is available and willing to provide a biospecimen for ES<sup>c</sup>, with a preference for two available parents. At least one parent consenting to ES of the child. For the prenatal cases, at least the mother had to consent to ES of a fetal sample as well as on herself.
4. Pediatric patients must have had at least one prior genetics appointment or evaluation.
5. All pediatric patients with a clinical indication for chromosomal microarray analysis (CMA) and all prenatal patients were required to have non-diagnostic CMA results prior to enrollment. Pregnancies and patients with a copy number variant not clearly associated with the phenotype were eligible for inclusion, as were patients who had previously undergone targeted or gene panel testing without a diagnosis.
6. Pregnant patients late in gestation, in whom ES results were not anticipated until after delivery, were included in the prenatal subgroup if consent occurred prior to delivery.
7. Twin gestations were eligible for inclusion if one or both fetuses were affected.

**Exclusion Criteria**

1. Prior ES performed for a clinical or research indication
2. Lack of phenotypic indication of a likely underlying genetic etiology
3. Both biological parents are unavailable

ID<sup>a</sup> = Intellectual disability; CP<sup>b</sup> = Cerebral palsy; ES<sup>c</sup> = exome sequencing. <sup>3</sup>Other includes: Pulmonary hypertension with alveolar capillary dysplasia with misalignment of the pulmonary veins; Apnea and hypoventilation; hypotonia; Immunodeficiency with hypogammaglobulinemia; Crohn's disease; juvenile rheumatoid arthritis; Retinal dystrophy; family history of consanguinity and affected sibling; Skin laxity; Respiratory distress; immunodeficiency; Pituitary mass; Dilated cardiomyopathy; family history of consanguinity; Liver hemangiomas; focal nodular hyperplasia of the liver; recurrent epistaxis; Growth delays; Failure to thrive and short stature; Growth delays.

**Supplementary table 13. Definition of Definitive Positive and Probable Positive Case Results for the CSER consortium**

|                                                                                                                                                                                                                                                                                                                                                                                                                                                                                                                                                                                                      |
|------------------------------------------------------------------------------------------------------------------------------------------------------------------------------------------------------------------------------------------------------------------------------------------------------------------------------------------------------------------------------------------------------------------------------------------------------------------------------------------------------------------------------------------------------------------------------------------------------|
| Definitive Positive                                                                                                                                                                                                                                                                                                                                                                                                                                                                                                                                                                                  |
| <ul style="list-style-type: none"> <li>• Implicated variant(s) are pathogenic</li> <li>• Phenotype and inheritance pattern consistent with condition</li> <li>• Known phase or <i>de novo</i> status</li> </ul>                                                                                                                                                                                                                                                                                                                                                                                      |
| Probable Positive                                                                                                                                                                                                                                                                                                                                                                                                                                                                                                                                                                                    |
| <ul style="list-style-type: none"> <li>• Implicated variant(s) are likely pathogenic or a combination of pathogenic/likely pathogenic</li> <li>• For recessive condition, combination of a pathogenic/likely pathogenic variant with a variant of uncertain significance provided no other inconclusive conditions (below) exist</li> <li>• Phenotype and inheritance pattern are consistent with condition</li> <li>• Known phase or <i>de novo</i> status, or in recessive condition with only one parent/sibling available, that family member has only one of the implicated variants</li> </ul> |
| Inconclusive                                                                                                                                                                                                                                                                                                                                                                                                                                                                                                                                                                                         |
| <p>Presence of one or more contributions to case-level ambiguity</p> <ul style="list-style-type: none"> <li>• Unknown phase</li> <li>• Variant uncertainty</li> <li>• Insufficient zygoty</li> <li>• Phenotype mismatch</li> <li>• Novel gene</li> </ul>                                                                                                                                                                                                                                                                                                                                             |
| Negative                                                                                                                                                                                                                                                                                                                                                                                                                                                                                                                                                                                             |
| <ul style="list-style-type: none"> <li>• All other cases</li> </ul>                                                                                                                                                                                                                                                                                                                                                                                                                                                                                                                                  |

Supplementary table 14

| gene                                    | amino acid        | transcript     | nucleotide change        | chromosc | position  | end_coordinate | reference   | alternate | moi                      | allele_origin            | acmg_classif | zygosity |
|-----------------------------------------|-------------------|----------------|--------------------------|----------|-----------|----------------|-------------|-----------|--------------------------|--------------------------|--------------|----------|
| genome_build is GRCh37 for all patients |                   |                |                          |          |           |                |             |           |                          |                          |              |          |
| GLI2                                    | p.W1146*          | NM_005270.4    | c.3438G>A                | 2        | 121746928 | 121746928      | G           | A         | AD                       | De novo                  | P            | het.     |
| MECP2                                   | p.Gln406Ter       | NM_004992.3    | c.1216C>T                | X        | 153296063 | 153296063      | G           | A         | XL                       | De novo                  | P            | het.     |
| KAT6A                                   | p.V1347fs*6       | NM_006766.4    | c.4038delT               | 8        | 41791700  | 41791700       | delA        | AD        | Unk., father unavailable | P                        | het.         |          |
| ARID1A                                  | p.P1898fs*25      | NM_006015.5    | c.5693delC               | 1        | 27106082  | 27106082       | delC        | AD        | De novo                  | P                        | het.         |          |
| ZIC3                                    | p.R320*           | NM_003413.3    | c.958C>T                 | X        | 136649808 | 136649808      | C           | T         | XL                       | Maternal                 | LP           | hemiz.   |
| TANGO2                                  | p.R86*            | NM_152906.5    | c.256C>T                 | 22       | 20040098  | 20040098       | C           | T         | AR                       | Mat. and Pat. (HZ)       | P            | HZ       |
| KMT2A                                   | S191*             | NM_005933.3    | c.572C>A                 | 11       | 118342446 | 118342446      | C           | A         | AD                       | Unk., father unavailable | P            | het.     |
| EP300                                   | p.R1055*          | NM_001429.3    | c.3163C>T                | 22       | 41551019  | 41551019       | C           | T         | AD                       | De novo                  | P            | het.     |
| DDX3X                                   | p.Arg326Cys       | NM_001356.4    | c.976C>T                 | X        | 41203603  | 41203603       | C           | T         | XL                       | De novo                  | P            | het.     |
| TRAF7                                   | p.R655Q           | NM_032271.2    | c.1964G>A                | 16       | 2226351   | 2226351        | G           | A         | AD                       | De novo                  | LP           | het.     |
| KAT6A                                   | p.K1410fs*7       | NM_006766.4    | c.4228_4232delAAAGA      | 8        | 41791506  | 41791510       | delTCTTT    | AD        | Unk., father unavailable | P                        | het.         |          |
| GLI2                                    | p.K647fs*48       | NM_005270.4    | c.1940delA               | 2        | 121742303 | 121742303      | delA        | AD        | Maternal                 | LP                       | het.         |          |
| SRD5A2                                  | p.Tyr235Phe       | NM_000348.3    | c.704A>T                 | 2        | 31751326  | 31751326       | T           | A         | AR                       | Mat. and Pat. (HZ)       | P            | HZ       |
| PDHA1                                   | p.T354P           | NM_000284.3    | c.1060A>C                | X        | 19377658  | 19377658       | A           | C         | XL                       | Unk., mother unavailable | LP           | het.     |
| EXT2                                    | p.Q424Q           | NM_000401.3    | c.1272G>A                | 11       | 44151688  | 44151688       | G           | A         | AR                       | Mat. and Pat. (HZ)       | LP           | HZ       |
| PDCD10                                  | p.K111fs*15       | NM_007217.4    | c.333delA                | 3        | 167413446 | 167413446      | delT        | AD        | De novo                  | P                        | het.         |          |
| EP300                                   | p.Y1162*          | NM_001429.3    | c.3485dupA               | 22       | 41553396  | 41553396       | dupA        | AD        | De novo                  | P                        | het.         |          |
| HNRNP2H2                                | p.R206Q           | NM_001032393.2 | c.617G>A                 | X        | 100667593 | 100667593      | G           | A         | XL                       | De novo                  | P            | het.     |
| ANKRD17                                 | p.Ala1920Serfs*20 | NM_032217.3    | c.5756dupG               | 4        | 73957589  | 73957589       | dupG        | AD        | De novo                  | LP                       | het.         |          |
| BRAF                                    | p.D638E           | NM_004333.5    | c.1914T>G                | 7        | 140449165 | 140449165      | A           | C         | AD                       | De novo                  | P            | het.     |
| NALCN                                   | p. Leu1150Ile     | NM_052867.3    | c.3448C>A                | 13       | 101742055 | 101742055      | G           | T         | AD                       | De novo                  | P            | het.     |
| KCNA2                                   | G197fs*4          | NM_004974.3    | c.590delG                | 1        | 111146815 | 111146815      | delC        | AD        | Maternal                 | P                        | het.         |          |
| PRRT2                                   | p.R217fs*8        | NM_001256442.1 | c.649dupC                | 16       | 29825024  | 29825024       | dupC        | AD        | Maternal                 | P                        | het.         |          |
| KMT2D                                   | p.M999*           | NM_003482.3    | c.2994delT               | 12       | 49444377  | 49444377       | delA        | AD        | De novo                  | P                        | het.         |          |
| INTS1                                   | p.M1013fs*55      | NM_001080453.2 | c.3036delC               | 7        | 1525046   | 1525046        | delG        | AR        | Maternal                 | LP                       | cpd het.     |          |
| INTS1                                   |                   | NM_001080453.2 | c.3430-2A>C              | 7        | 1523491   | 1523491        | T           | G         | AR                       | Unk., father unavailable | LP           | cpd het. |
| KMT2A                                   | p.I312fs*10       | NM_005933.3    | c.934_935insC            | 11       | 118342808 | 118342809      | insC        | AD        | De novo                  | P                        | het.         |          |
| KMT2A                                   | p.Ser2805fs*22    | NM_005933.3    | c.8405_8409delGCTCA      | 11       | 118375021 | 118375025      | delGCTCA    | AD        | De novo                  | P                        | het.         |          |
| CHD7                                    |                   | NM_017780.3    | c.4533+1G>A              | 8        | 61750815  | 61750815       | G           | A         | AD                       | De novo                  | P            | het.     |
| KRIT1                                   | p.S301*           | NM_194456.1    | c.902C>G                 | 7        | 91863850  | 91863850       | G           | C         | AD                       | De novo                  | P            | het.     |
| KMT2A                                   | p.R1154W          | NM_005933.3    | c.3460C>T                | 11       | 118348807 | 118348807      | C           | T         | AD                       | De novo                  | P            | het.     |
| SOX10                                   | p.S135N           | NM_006941.3    | c.404G>A                 | 22       | 38379388  | 38379388       | C           | T         | AD                       | De novo                  | LP           | het.     |
| POGZ                                    | p.Q1005fs*5       | NM_015100.3    | c.3041delA               | 1        | 151378470 | 151378470      | delT        | AD        | Paternal                 | P                        | het.         |          |
| PDHA1                                   | p.R302C           | NM_000284.3    | c.904C>T                 | X        | 19377038  | 19377038       | C           | T         | XL                       | De novo                  | P            | het.     |
| TFAP2A                                  | p.R254W           | NM_003220.2    | c.760C>T                 | 6        | 10404745  | 10404745       | G           | A         | AD                       | De novo                  | P            | het.     |
| FOXF1                                   | p.R138P           | NM_001451.2    | c.413G>C                 | 16       | 86544588  | 86544588       | G           | C         | AD                       | De novo                  | LP           | het.     |
| SETBP1                                  | p.Ile871Thr       | NM_015559.3    | c.2612T>C                | 18       | 42531917  | 42531917       | T           | C         | AD                       | De novo                  | P            | het.     |
| GNAS                                    | p.R231C           | NM_000516      | c.691C>T                 | 20       | 57484607  | 57484607       | C           | T         | AD                       | De novo                  | P            | het.     |
| SLC26A2                                 | p.P100fs*5        | NM_000112.3    | c.299delC                | 5        | 149357514 | 149357514      | delC        | AR        | Mat. and Pat. (HZ)       | P                        | HZ           |          |
| MECP2                                   | p.T158M           | NM_004992.3    | c.194C>T                 | X        | 153297841 | 153297841      | G           | A         | XL                       | De novo                  | P            | het.     |
| DGAT1                                   | p.G2fs*65         | NM_012079.5    | c.5delG                  | 8        | 145550295 | 145550295      | delC        | AR        | Mat. and Pat. (HZ)       | P                        | HZ           |          |
| RAD21                                   | p.R478*           | NM_006265.2    | c.1432C>T                | 8        | 117864225 | 117864225      | G           | A         | AD                       | Maternal                 | P            | het.     |
| TCF12                                   | p.R7fs*5          | NM_207036      | c.19delC                 | 15       | 57212130  | 57212130       | delC        | AD        | Unk., father unavailable | LP                       | het.         |          |
| PTEN                                    | p.Leu345fs*16     | NM_000314.6    | c.1032dupG               | 10       | 89725049  | 89725049       | dupG        | AD        | De novo                  | P                        | het.         |          |
| SCN2A                                   | p.K905E           | NM_021007.2    | c.2317A>G                | 2        | 166188007 | 166188007      | A           | G         | AD                       | De novo                  | P            | het.     |
| TUBB2A                                  | p.P358T           | NM_001069.2    | c.1072C>A                | 6        | 3154363   | 3154363        | G           | T         | AD                       | De novo                  | LP           | het.     |
| SLC6A1                                  | p.A288V           | NM_003042.3    | c.863C>T                 | 3        | 11067472  | 11067472       | C           | T         | AD                       | De novo                  | LP           | het.     |
| MECP2                                   | p.Arg168Ter       | NM_004992.3    | c.502C>T                 | X        | 153296777 | 153296777      | G           | A         | XL                       | De novo                  | P            | het.     |
| ALS2                                    | p.K1174*          | NM_020919.3    | c.3520A>T                | 2        | 202588157 | 202588157      | T           | A         | AR                       | Mat. and Pat. (HZ)       | P            | HZ       |
| ACTG1                                   | p.P70L            | NM_001199954.2 | c.209C>T                 | 17       | 79479083  | 79479083       | G           | A         | AD                       | De novo                  | P            | het.     |
| MAGEL2                                  | p.N1084fs*22      | NM_019066.4    | c.3246delC               | 15       | 23889644  | 23889644       | delG        | AD        | Unk., father unavailable | P                        | het.         |          |
| AHD1                                    | p.R587fs*56       | NM_001029882.3 | c.1758dupA               | 1        | 27876869  | 27876869       | dupT        | AD        | De novo                  | P                        | het.         |          |
| ACAD9                                   | p.P370fs*13       | NM_014049.4    | c.1109delC               | 3        | 128623308 | 128623308      | delC        | AR        | De novo                  | P                        | cpd het.     |          |
| ACAD9                                   | p.R266W           | NM_014049.4    | c.796C>T                 | 3        | 128618292 | 128618292      | C           | T         | AR                       | Maternal                 | LP           | cpd het. |
| AQP2                                    | p.G64R            | NM_000486.5    | c.190G>A                 | 12       | 50344803  | 50344803       | G           | A         | AR                       | Mat. and Pat. (HZ)       | P            | HZ       |
| HRAS                                    | p.G12S            | NM_176795.4    | c.34G>A                  | 11       | 534289    | 534289         | C           | T         | AD                       | De novo                  | P            | het.     |
| ZC4H2                                   | p.R198W           | NM_018684.3    | c.592C>T                 | X        | 64137746  | 64137746       | G           | A         | XL                       | De novo                  | LP           | hemiz.   |
| BMP2                                    | p.R170*           | NM_001200.3    | c.508C>T                 | 20       | 6759053   | 6759053        | C           | T         | AD                       | Maternal                 | P            | het.     |
| EHMT1                                   |                   | NM_024757.4    | c.2712+1G>A              | 9        | 140695437 | 140695437      | G           | A         | AD                       | De novo                  | P            | het.     |
| USP9X                                   | p.P87fs*8         | NM_001039590.2 | c.260delC                | X        | 40990727  | 40990727       | delC        | XL        | De novo                  | P                        | het.         |          |
| COL6A2                                  | p.C37*            | NM_001849.3    | c.111C>A                 | 21       | 47531501  | 47531501       | C           | A         | AD                       | Paternal                 | LP           | het.     |
| SLC17A5                                 | p.T178fs          | NM_012434.5    | c.533del                 | 6        | 74348215  | 74348215       | del         | AR        | Maternal                 | P                        | cpd het.     |          |
| SLC17A5                                 | p.R39C            | NM_012434.5    | c.115C>T                 | 6        | 74354306  | 74354306       | G           | A         | AR                       | Paternal                 | P            | cpd het. |
| KMT2A                                   | p.E2530Kfs*10     | NM_005933.3    | c.7588delG               | 11       | 118374204 | 118374204      | delG        | AD        | De novo                  | P                        | het.         |          |
| ARX                                     | p.S319*           | NM_139058.2    | c.956C>A                 | X        | 25031156  | 25031156       | G           | T         | XL                       | De novo                  | P            | het.     |
| ECEL1                                   | p.F37fs*151       | NM_004826.4    | c.110_155del             | 2        | 233351209 | 233351254      | del         | AR        | Mat. and Pat. (HZ)       | P                        | HZ           |          |
| KIFBP                                   | p.L363fs*7        | NM_015634.3    | c.1086_1095delTCTTGATAAA | 10       | 70775392  | 70775401       | delTCTTGAT, | AR        | Mat. and Pat. (HZ)       | P                        | HZ           |          |
| KIF1A                                   | p.P305L           | NM_001244008.1 | c.914C>T                 | 2        | 241715312 | 241715312      | G           | A         | AD                       | De novo                  | P            | het.     |
| ZC4H2                                   | p.R211W           | NM_018684.3    | c.631C>T                 | X        | 64137707  | 64137707       | G           | A         | XL                       | Maternal                 | LP           | hemiz.   |
| NR3C2                                   | p.Q919*           | NM_000901.4    | c.2767C>T                | 4        | 149035287 | 149035287      | G           | A         | AD                       | Maternal                 | LP           | het.     |
| TBX5                                    | p.E69*            | NM_000192.3    | c.205G>T                 | 12       | 114839668 | 114839668      | C           | A         | AD                       | De novo                  | P            | het.     |
| LAMA2                                   | p.R1450*          | NM_000426.3    | c.4348C>T                | 6        | 129663524 | 129663524      | C           | T         | AR                       | Maternal                 | P            | cpd het. |
| LAMA2                                   | p.D2383*          | NM_000426.3    | c.7144C>T                | 6        | 129785586 | 129785586      | C           | T         | AR                       | Paternal                 | P            | cpd het. |
| PMM2                                    |                   | NM_000303.2    | c.174+1G>A               | 16       | 8895764   | 8895764        | G           | A         | AR                       | Unk., father unavailable | P            | cpd het. |
| PMM2                                    | p.V60L            | NM_000303.2    | c.178G>T                 | 16       | 8895767   | 8895767        | G           | T         | AR                       | Maternal                 | LP           | cpd het. |
| MBD5                                    | p.P313fs*4        | NM_018328.4    | c.936dupA                | 2        | 149226448 | 149226448      | dupA        | AD        | Unk., father unavailable | LP                       | het.         |          |
| KMT2D                                   | p.P498*           | NM_003482.3    | c.1491_1492delGC         | 12       | 49445974  | 49445975       | delGC       | AD        | De novo                  | P                        | het.         |          |

|         |                   |                    |                          |    |           |           |         |            |    |                          |     |          |
|---------|-------------------|--------------------|--------------------------|----|-----------|-----------|---------|------------|----|--------------------------|-----|----------|
| NFIX    | p.C102fs*17       | NM_001271043.2     | c.303dupC                | 19 | 13136086  | 13136086  | dupC    |            | AD | De novo                  | P   | het.     |
| CHD7    | p.E871D           | NM_017780.4        | c.2613G>T                | 18 | 61729060  | 61729060  | G       | T          | AD | Unk., father unavailable | LP  | het.     |
| HRAS    | p.G13R            | NM_005343.3        | c.37G>C                  | 11 | 534286    | 534286    | C       | G          | AD | De novo                  | P   | het.     |
| SLC9A6  | p.E356fs*11       | NM_001042537.1     | c.970_973delGAGT         | X  | 135092671 | 135092674 | delGAGT |            | XL | Maternal                 | P   | het.     |
| NSD1    | p.I1122fs*3       | NM_022455.4        | c.3364dupA               | 5  | 176638764 | 176638764 | dupA    |            | AD | De novo                  | P   | het.     |
| OFD1    | p.E829*           | NM_003611.2        | c.2364dupT               | X  | 13779307  | 13779307  | dupT    |            | XL | Maternal                 | LP  | hemiz.   |
| WAC     | p.S491fs*9        | NM_016628.4        | c.1335delG               | 10 | 28900749  | 28900749  |         | delG       | AD | De novo                  | P   | het.     |
| TUBA1A  | p.K430_E434del    | NM_006009.3        | c.1288_1302delAAGGATTATG | 12 | 49578847  | 49578861  |         | delCTCTCA' | AD | De novo                  | P   | het.     |
| CDK13   | p.N842S           | NM_003718.4        | c.2525A>G                | 7  | 40085606  | 40085606  | A       | G          | AD | De novo                  | P   | het.     |
| PTPN11  | p.P491T           | NM_002834.4        | c.1471C>A                | 12 | 112926851 | 112926851 | C       | A          | AD | Unk., father unavailable | LP  | het.     |
| DNAH9   | p.R995fs*5        | NM_001372.3        | c.2984delG               | 17 | 11572742  | 11572742  |         | delG       | AR | Mat. and Pat. (HZ)       | P   | HZ       |
| KMT2A   | p.C1448Y          | NM_001197104.1     | c.4343G>A                | 11 | 118359339 | 118359339 | G       | A          | AD | De novo                  | P   | het.     |
| LAMA1   | p.Q2890*          | NM_005559.3        | c.8668C>T                | 18 | 6948444   | 6948444   | G       | A          | AR | Maternal                 | LP  | cpd het. |
| LAMA1   | p.I136T           | NM_005559.3        | c.4077>C                 | 18 | 7050874   | 7050874   | A       | G          | AR | Paternal                 | VUS | cpd het. |
| AGA     | p.T123Hfs*20      | NM_000027.4        | c.367_371delAACACA       | 4  | 178360753 | 178360757 |         | delTGTGT   | AR | Paternal                 | P   | cpd het. |
| AGA     |                   | NM_000027.4        | c.911-2A>G               | 4  | 178354399 | 178354399 | T       | C          | AR | Maternal                 | P   | cpd het. |
| CHD3    | p.R1025Q          | NM_001005271.2     | c.3074G>A                | 17 | 7803968   | 7803968   | G       | A          | AD | De novo                  | LP  | het.     |
| FGFR3   | p.Arg248Cys       | NM_000142.4        | c.742C>T                 | 4  | 1803564   | 1803564   | C       | T          | AD | De novo                  | P   | het.     |
| CTCF    | p.H373Q           | NM_006565.3        | c.1119T>A                | 16 | 67654632  | 67654632  | T       | A          | AD | De novo                  | LP  | het.     |
| SOX2    | p.W166*           | NM_003106.4        | c.498G>A                 | 3  | 181430646 | 181430646 | G       | A          | AD | De novo                  | P   | het.     |
| ELN     | p.G756fs          | NM_000501.4        | c.2262delA               | 7  | 73483117  | 73483117  |         | delA       | AD | Maternal                 | P   | het.     |
| NFIB    | p.R89*            | NM_001190737.2     | c.265C>T                 | 9  | 14307285  | 14307285  | G       | A          | AD | De novo                  | P   | het.     |
| BCS1L   | p.R56*            | NM_001257342.2     | c.166C>T                 | 2  | 219525876 | 219525876 | C       | T          | AR | Maternal                 | P   | cpd het. |
| BCS1L   | p.R90H            | NM_001257342.2     | c.269G>A                 | 2  | 219525979 | 219525979 | G       | A          | AR | Unk., father unavailable | LP  | cpd het. |
| ANKRD11 | p.E1282fs         | NM_013275.5        | c.3843dupT               | 16 | 89349107  | 89349107  | dupA    |            | AD | Paternal                 | P   | het.     |
| ANKRD11 | p.Arg1466fs*87    | NM_013275.5        | c.4396_4397delAAG        | 16 | 89348553  | 89348554  |         | delCT      | AD | De novo                  | P   | het.     |
| PUS7    | p.L214fs          | NM_019042.5        | c.640_641delCT           | 7  | 105142956 | 105142957 |         | delAG      | AR | Maternal                 | LP  | cpd het. |
| PUS7    | p.S100fs          | NM_019042.5        | c.298_299delAAG          | 7  | 105148661 | 105148662 |         | delCT      | AR | Unk., father unavailable | LP  | cpd het. |
| EFTUD2  | p.R354*           | NM_004247.4        | c.1060C>T                | 17 | 42945264  | 42945264  | G       | A          | AD | De novo                  | P   | het.     |
| RIT1    | p.F82L            | NM_006912.6        | c.246T>G                 | 1  | 155874285 | 155874285 | A       | C          | AD | De novo                  | P   | het.     |
| CDK13   | p.N842S           | NM_003718.5        | c.2525A>G                | 7  | 40085606  | 40085606  | A       | G          | AD | De novo                  | P   | het.     |
| SLC19A3 | p.Val139Glu       | NM_025243.4        | c.416T>A                 | 2  | 228564015 | 228564015 | A       | T          | AR | Mat. and Pat. (HZ)       | LP  | HZ       |
| AHDC1   | p.K725fs*7        | NM_001029882.3     | c.217delA                | 1  | 27878410  | 27878410  |         | delT       | AD | De novo                  | P   | het.     |
| SIN3A   | p.Q339*           | NM_015477.2        | c.1015C>T                | 15 | 75702621  | 75702621  | G       | A          | AD | De novo                  | P   | het.     |
| KRAS    | p.Thr74Pro        | NM_033360.3        | c.220A>C                 | 12 | 25380238  | 25380238  | T       | G          | AD | De novo                  | LP  | het.     |
| CHAMP1  | p.E216_S217ins*   | NM_032436.4        | c.647_649dupAGT          | 13 | 115089964 | 115089966 | dupAGT  |            | AD | De novo                  | P   | het.     |
| IDUA    | p.Gln70Ter        | NM_000203.5        | c.208C>T                 | 4  | 981646    | 981646    | C       | T          | AR | Mat. and Pat. (HZ)       | P   | HZ       |
| COL2A1  | p.Gly444Asp       | NM_001844.5        | c.1331G>A                | 12 | 48380895  | 48380895  | C       | T          | AD | Maternal                 | LP  | het.     |
| KMT2D   | p.K3258fs*72      | NM_003482.3        | c.9773delA               | 12 | 49431366  | 49431366  |         | delT       | AD | De novo                  | P   | het.     |
| POMT2   | p.Arg659Gln       | NM_013382.5        | c.1976G>A                | 14 | 77745128  | 77745128  | C       | T          | AR | Mat. and Pat. (HZ)       | LP  | HZ       |
| FOXP2   | p.Q196*           | NM_014491.4        | c.586C>T                 | 7  | 114270049 | 114270049 | C       | T          | AD | Unk., father unavailable | P   | het.     |
| PPP2R5D | p.Q200L           | NM_006245.4        | c.598G>A                 | 6  | 42975009  | 42975009  | G       | A          | AD | De novo                  | P   | het.     |
| RAD21   | p.C585R           | NM_006265.2        | c.1753T>C                | 8  | 117859882 | 117859882 | A       | G          | AD | De novo                  | P   | het.     |
| SYNGAP1 | p.R248P           | NM_006772.2        | c.743G>C                 | 6  | 33403371  | 33403371  | G       | C          | AD | De novo                  | LP  | het.     |
| RP56KA3 | p.Y144*           | NM_004586.2        | c.432T>G                 | X  | 20212361  | 20212361  | A       | C          | XL | De novo                  | P   | het.     |
| COL6A1  | p.G284R           | NM_001848.2        | c.850G>A                 | 21 | 47409043  | 47409043  | G       | A          | AD | Paternal                 | P   | het.     |
| ARHGEF9 | p.R289*           | NM_015185.2        | c.865C>T                 | X  | 62893977  | 62893977  | G       | A          | XL | Maternal                 | P   | hemiz.   |
| PTPN11  | p.I56V            | NM_002834.4        | c.166A>G                 | 12 | 112888150 | 112888150 | A       | G          | AD | Maternal                 | LP  | het.     |
| MAGEL2  | p.Q93*            | NM_019066.4        | c.277C>T                 | 15 | 23892613  | 23892613  | G       | A          | AD | De novo                  | P   | het.     |
| PIEZO1  | p.Pro1906Lysfs*55 | NM_001142864.4     | c.5716_5738del           | 16 | 88787087  | 88787109  | del     |            | AR | Paternal                 | LP  | cpd het. |
| PIEZO1  | p.Ile2270Thr      | NM_001142864.4     | c.6809T>C                | 16 | 88783084  | 88783084  | A       | G          | AR | Maternal                 | VUS | cpd het. |
| MSL3    | p.Q203*           | NM_078629.4        | c.607C>T                 | X  | 11780974  | 11780974  | C       | T          | XL | De novo                  | P   | het.     |
| KAT6A   | p.Gln1871*        | NM_006766.3        | c.5611C>T                | 8  | 41790127  | 41790127  | G       | A          | AD | Unk., father unavailable | LP  | het.     |
| SHOC2   | p.Met173Ile       | NM_007373.3        | c.519G>A                 | 10 | 112724635 | 112724635 | G       | A          | AD | De novo                  | LP  | het.     |
| KCNK4   | p.A172E           | NM_033310.3        | c.515C>A                 | 11 | 64064979  | 64064979  | C       | A          | AD | De novo                  | LP  | het.     |
| MCPH1   | p.T48I            | NM_024596.3        | c.143C>T                 | 8  | 6272314   | 6272314   | C       | T          | AR | Mat. and Pat. (HZ)       | LP  | HZ       |
| MYRF    | p.Ser264fs        | NM_001127392.1     | c.789dupC                | 11 | 61539020  | 61539020  | dupC    |            | AD | De novo                  | LP  | het.     |
| FGFR1   | p.Arg254Trp       | NM_015850.3        | c.760C>T                 | 8  | 38282197  | 38282197  | G       | A          | AD | De novo                  | LP  | het.     |
| GRIN2A  | p.A818V           | NM_000833.3        | c.2453C>T                | 16 | 9862850   | 9862850   | G       | A          | AD | De novo                  | LP  | het.     |
| PBX1    | p.C273R           | NM_002585.3        | c.817T>C                 | 1  | 164776894 | 164776894 | T       | C          | AD | De novo                  | LP  | het.     |
| TRPV4   | p.Phe471del       | NM_021625.4(TRPV4) | c.1412_1414del           | 12 | 110232211 | 110232213 | del     |            | AD | De novo                  | P   | het.     |
| FOXC2   | p.Glu343Ter       | NM_005251.3        | c.1027G>T                | 16 | 86601968  | 86601968  | G       | T          | AD | Maternal                 | LP  | het.     |
| DHCR24  |                   | NM_014762.3        | c.1218+1G>A              | 1  | 55319709  | 55319709  | C       | T          | AR | Maternal                 | P   | cpd het. |
| DHCR24  | p.Gln402*         | NM_014762.3        | c.1204C>T                | 1  | 55319724  | 55319724  | G       | A          | AR | Paternal                 | P   | cpd het. |
| CSNK2B  | p.Q31*            | NM_001282385.1     | c.91C>T                  | 6  | 31635663  | 31635663  | AD      |            | AD | Unk., mother unavailable | P   | het.     |
| SF3B4   | p.Met1?           | NM_005850.4        | c.2T>C                   | 1  | 149899650 | 149899650 | A       | G          | AD | De novo                  | P   | het.     |
| ACTG2   | p.Arg257His       | NM_001615.4(ACTG2) | c.770G>A                 | 2  | 74141963  | 74141963  | G       | A          | AD | De novo                  | P   | het.     |
| PTPN11  | p.Phe285Ser       | NM_002834.4        | c.854T>C                 | 12 | 112915455 | 112915455 | T       | C          | AD | De novo                  | P   | het.     |
| CACNA1A | p.I480fs          | NM_001127221.1     | c.1438delA               | 19 | 13428046  | 13428046  |         | delT       | AD | Maternal                 | LP  | het.     |
| SET     | p.W226*           | NM_001287737.1     | c.678G>A                 | 9  | 131456063 | 131456063 | G       | A          | AD | De novo                  | P   | het.     |
| GRIN2D  | p.V667I           | NM_000836.2        | c.1999G>A                | 19 | 48922979  | 48922979  | G       | A          | AD | Unk., father unavailable | LP  | het.     |
| PTPN11  | p.Phe285Ser       | NM_002834.4        | c.854T>C                 | 12 | 112915455 | 112915455 | T       | C          | AD | De novo                  | P   | het.     |
| PIEZO1  | p.Met870Ile       | NM_001142864.2     | c.2610G>A                | 16 | 88799740  | 88799740  | C       | T          | AD | Maternal                 | LP  | het.     |
| CDK10   | p.W291*           | NM_001160367.1     | c.872G>A                 | 16 | 89762102  | 89762102  | G       | A          | AR | Mat. and Pat. (HZ)       | P   | HZ       |
| CHD7    | p.R494*           | NM_017780.3        | c.1480C>T                | 8  | 61655471  | 61655471  | C       | T          | AD | Unk., father unavailable | P   | het.     |
| SRCAP   | p.R2444Ter        | NM_006662.3        | c.7330C>T                | 16 | 30748691  | 30748691  | C       | T          | AD | De novo                  | P   | het.     |
| ASH1L   | p.R2044fs         | NM_018489.2        | c.6128dupT               | 1  | 155349883 | 155349883 | dupA    |            | AD | Unk., father unavailable | LP  | het.     |
| AR      | p.Met746Thr       | NM_000044.4(AR)    | c.2237T>C                | X  | 66937383  | 66937383  | T       | C          | XL | Maternal                 | P   | hemiz.   |
| CEP55   | p.Arg64*          | NM_001127182.1     | c.190C>T                 | 10 | 95262876  | 95262876  | C       | T          | AR | Maternal                 | LP  | cpd het. |



|         |                  |                |                           |    |           |           |   |   |            |                          |                    |          |          |
|---------|------------------|----------------|---------------------------|----|-----------|-----------|---|---|------------|--------------------------|--------------------|----------|----------|
| CEP55   | p.His458Arg      | NM_001127182.1 | c.1373A>G                 | 10 | 95287888  | 95287888  | A | G | AR         | Paternal                 | VUS                | cpd het. |          |
| PTPN11  | p.Asp61Gly       | NM_002834.5    | c.182A>G                  | 12 | 112888166 | 112888166 | A | G | AD         | De novo                  | P                  | het.     |          |
| SATB2   | p.R389C          | NM_001172509.1 | c.1165C>T                 | 2  | 200213432 | 200213432 | G | A | AD         | De novo                  | P                  | het.     |          |
| SUZ12   | p.Gly484fs       | NM_015355.2    | c.1451delG                | 17 | 30321596  | 30321596  |   |   | delG       | AD                       | De novo            | LP het.  |          |
| FOXP3   |                  | NM_014009.3    | c.648-2A>G                | X  | 49112265  | 49112265  | T | C | XL         | Maternal                 | LP                 | hemiz.   |          |
| SATB2   | p.Q391P          | NM_001172509.1 | c.1172A>C                 | 2  | 200213425 | 200213425 | T | G | AD         | De novo                  | LP                 | het.     |          |
| SMAD4   | p.I500V          | NM_005359.5    | c.1498A>G                 | 18 | 48604676  | 48604676  | A | G | AD         | De novo                  | P                  | het.     |          |
| KMT2D   | p.Q2004*         | NM_003482.3    | c.6010C>T                 | 12 | 49435971  | 49435971  | G | A | AD         | De novo                  | P                  | het.     |          |
| IFT74   |                  | NM_025103.4    | c.1685-1G>T               | 9  | 27062615  | 27062615  | G | T | AR         | Mat. and Pat. (HZ)       | LP                 | HZ       |          |
| HRAS    | p.Gly12Asp       | NM_005343.4    | c.35G>A                   | 11 | 534288    | 534288    | C | T | AD         | De novo                  | P                  | het.     |          |
| CYP1B1  | p.Glu387Lys      | NM_000104.3    | c.1159G>A                 | 2  | 38298338  | 38298338  | C | T | AR         | Maternal                 | LP                 | cpd het. |          |
| CYP1B1  | p.Arg368His      | NM_000104.3    | c.1103G>A                 | 2  | 38298394  | 38298394  | C | T | AR         | Paternal                 | VUS                | cpd het. |          |
| KMT2D   | p.R5448*         | NM_003482.3    | c.16342C>T                | 12 | 49416133  | 49416133  | G | A | AD         | De novo                  | P                  | het.     |          |
| CHD3    | p.N1159L         | NM_005852.4    | c.3477C>A                 | 17 | 7806361   | 7806361   | C | A | AD         | De novo                  | P                  | het.     |          |
| SLC16A2 | p.R197H          | NM_006517.5    | c.590G>A                  | X  | 73744208  | 73744208  | G | A | XL         | De novo                  | LP                 | het.     |          |
| WDR45   |                  | NM_007075.3    | c.235+1G>A                | X  | 48935301  | 48935301  | C | T | XL         | De novo                  | P                  | het.     |          |
| CHD7    | p.Val1141fs      | NM_017780.3    | c.3422_3423delTG          | 8  | 61741265  | 61741266  |   |   | delTG      | AD                       | De novo            | P        | het.     |
| ZBTB18  | p.R45*           | NM_006352.4    | c.133C>T                  | 1  | 244217236 | 244217236 | C | T | AD         | De novo                  | P                  | het.     |          |
| SPTAN1  | p.R139*          | NM_001195532.1 | c.415C>T                  | 9  | 131337005 | 131337005 | C | T | AD         | De novo                  | LP                 | het.     |          |
| ZFPM2   | p.Arg117*        | NM_12082.3     | c.349C>T                  | 8  | 106573638 | 106573638 | C | T | AD         | De novo                  | P                  | het.     |          |
| CACNA1A | p.A446fs         | NM_000068.3    | c.1334_1335dupTA          | 19 | 13441071  | 13441072  |   |   | dupTA      | AD                       | Maternal           | LP het.  |          |
| FGFR3   | p.Arg248Cys      | NM_000142.5    | c.742C>T                  | 4  | 1803564   | 1803564   | C | T | AD         | Unk., father unavailable | P                  | het.     |          |
| PIEZO1  | p.Val598Met      | NM_001142864.2 | c.1792G>A                 | 16 | 88801339  | 88801339  | C | T | AR         | De novo                  | LP                 | cpd het. |          |
| RIT1    | p.Ala94Ser       | NM_006912.6    | c.280G>T                  | 1  | 155874251 | 155874251 | C | A | AD         | De novo                  | P                  | het.     |          |
| TMEM237 |                  | NM_001044385.2 | c.943+1G>T                | 2  | 202492798 | 202492798 | C | A | AR         | Paternal                 | P                  | cpd het. |          |
| TMEM237 |                  | NM_001044385.2 | c.869+1delG               | 2  | 202493952 | 202493952 |   |   | delC       | AR                       | Maternal           | P        | cpd het. |
| FLNA    | p.F2353fs        | NM_001456.3    | c.7035delT                | X  | 153579374 | 153579374 |   |   | delA       | XL                       | De novo            | LP het.  |          |
| HRAS    | p.Gly13Asp       | NM_005343.4    | c.38G>A                   | 11 | 534285    | 534285    | C | T | AD         | De novo                  | P                  | het.     |          |
| CTCF    |                  | NM_006565.3    | c.782-1G>C                | 16 | 67645853  | 67645853  | G | C | AD         | Unk., father unavailable | LP                 | het.     |          |
| KAT6B   | p.Pro1332fs      | NM_012330.3    | c.3995delC                | 10 | 76788577  | 76788577  |   |   | delC       | AD                       | De novo            | P        | het.     |
| KMT2D   | (p.Gln4157Ter    | NM_003482.3    | c.12469C>T                | 12 | 49426019  | 49426019  | G | A | AD         | De novo                  | P                  | het.     |          |
| FGFR3   | p.Lys652Glu      | NM_000142.5    | c.195A>G                  | 4  | 1807895   | 1807895   | A | G | AD         | De novo                  | P                  | het.     |          |
| ARID1A  | p.Glu59*         | NM_006015.4    | c.175G>T                  | 1  | 27023069  | 27023069  | G | T | AD         | De novo                  | P                  | het.     |          |
| COL1A1  | p.Thr1431fs      | NM_000088.3    | c.4291delA                | 17 | 48262967  | 48262967  |   |   | delT       | AD                       | De novo            | P        | het.     |
| HDAC8   | p.T326_Pro332del | NM_018486.2    | c.976_996delIACACTATCTCTC | X  | 71681863  | 71681883  |   |   | delTGGGATC | XL                       | De novo            | LP       | het.     |
| TRAF7   | p.Arg371Q        | NM_032271.2    | c.1112G>T                 | 16 | 2223814   | 2223814   | G | A | AD         | De novo                  | LP                 | het.     |          |
| DYRK1A  | p.R467*          | NM_130438.2    | c.1399C>T                 | 21 | 38877745  | 38877745  | C | T | AD         | De novo                  | P                  | het.     |          |
| ACTA1   | p.Gly76Arg       | NM_001100.3    | c.226G>C                  | 1  | 229568531 | 229568531 | C | G | AD         | De novo                  | P                  | het.     |          |
| PTPN11  | p.Asp61Gly       | NM_002834.5    | c.182A>G                  | 12 | 112888166 | 112888166 | A | G | AD         | De novo                  | P                  | het.     |          |
| PTPN11  | p.Thr507Lys      | NM_002834.4    | c.1520C>A                 | 12 | 112926900 | 112926900 | C | A | AD         | De novo                  | P                  | het.     |          |
| CBL     | p.Asp390V        | NM_005188.3    | c.1169A>T                 | 11 | 119148949 | 119148949 | A | T | AD         | De novo                  | LP                 | het.     |          |
| SUMF1   |                  |                |                           | 3  |           |           |   |   | Del_exon9  | AR                       | Mat. and Pat. (HZ) | LP       | HZ       |
| CNOT3   | p.S415fs         | NM_014516.3    | c.1242dupC                | 19 | 54652230  | 54652230  |   |   | dupC       | AD                       | De novo            | P        | het.     |
| KANSL1  | p.L496fs         | NM_015443      | c.1485_1488delITCTT       | 17 | 44159852  | 44159855  |   |   | delAAGA    | AD                       | De novo            | P        | het.     |
| FREM2   | p.Thr251fs       | NM_207361.4    | c.750_751dupGA            | 13 | 39262231  | 39262232  |   |   | dupGA      | AR                       | Paternal           | P        | cpd het. |
| FREM2   | p.Phe1722fs      | NM_207361.4    | c.5162dupA                | 13 | 39266643  | 39266643  |   |   | dupA       | AR                       | Maternal           | P        | cpd het. |
| DYNC2H1 | p.Arg1423Cys     | NM_001377.3    | c.4267C>T                 | 11 | 103029645 | 103029645 | C | T | AR         | Maternal                 | LP                 | cpd het. |          |
| DYNC2H1 | p.Gln1573Pro     | NM_001377.3    | c.4718A>C                 | 11 | 103036733 | 103036733 | A | C | AR         | Paternal                 | VUS                | cpd het. |          |
| HBA2    | p.Gly60Asp       | NM_000517.6    | c.179G>A                  | 16 | 223207    | 223207    | G | A | AR         | Maternal                 | P                  | cpd het. |          |
| POC1A   | p.R81Ter         | NM_015426.5    | c.241C>T                  | 3  | 52183866  | 52183866  | G | A | AR         | Mat. and Pat. (HZ)       | P                  | HZ       |          |
| TUBA1A  | p.Asn18Ser       | NM_006009.4    | c.53A>G                   | 12 | 49580567  | 49580567  | T | C | AD         | De novo                  | P                  | het.     |          |
| TPM1    | p.Arg178His      | NM_001018005.2 | c.533G>A                  | 15 | 63353108  | 63353108  | G | A | AD         | De novo                  | P                  | het.     |          |
| COL2A1  | p.G1362fs        | NM_001844.4    | c.4085delG                | 12 | 48368104  | 48368104  |   |   | delC       | AD                       | De novo            | P        | het.     |
| POMT2   | p.Gln733Ter      | NM_013382.5    | c.2197C>T                 | 14 | 77743775  | 77743775  | G | A | AR         | Maternal                 | P                  | cpd het. |          |
| POMT2   | p.Thr677Ile      | NM_013382.5    | c.2030C>T                 | 14 | 77745074  | 77745074  | G | A | AR         | Paternal                 | VUS                | cpd het. |          |
| DYNC2H1 | p.Asp3015Gly     | NM_001377.3    | c.9044A>G                 | 11 | 103091449 | 103091449 | A | G | AR         | De novo                  | P                  | cpd het. |          |
| DYNC2H1 | p.Trp2155*       | NM_001377.3    | c.6464G>A                 | 11 | 103052602 | 103052602 | G | A | AR         | Paternal                 | P                  | cpd het. |          |
| PIEZO1  | p.Gln461*        | NM_001142864.2 | c.1381C>T                 | 16 | 88802732  | 88802732  | G | A | AD         | Paternal                 | P                  | het.     |          |
| HNRNP2  | p.Arg206Trp      | NM_019597.5    | c.616C>T                  | X  | 100667592 | 100667592 | C | T | XL         | De novo                  | P                  | het.     |          |
| SHOC2   | p.S2G            | NM_007373.4    | c.4A>G                    | 10 | 112724120 | 112724120 | A | G | AD         | De novo                  | P                  | het.     |          |
| ALPL    | p.Tyr178His      | NM_000478.4    | c.532T>C                  | 1  | 21890593  | 21890593  | T | C | AR         | Paternal                 | LP                 | cpd het. |          |
| ALPL    |                  | NM_000478.4    | c.648+5G>C                | 1  | 21890714  | 21890714  | G | C | AR         | Maternal                 | VUS                | cpd het. |          |
| SYNE1   | p.Gln6319        | NM_182961.3    | c.18955C>T                | 6  | 152583184 | 152583184 | G | A | AR         | Maternal                 | P                  | cpd het. |          |
| SYNE1   | p.Trp7761        | NM_182961.3    | c.23283G>A                | 6  | 152510405 | 152510405 | C | T | AR         | Paternal                 | P                  | cpd het. |          |
| ZEB2    |                  | NM_014795.3    | c.917-1G>A                | 2  | 145157838 | 145157838 | C | T | AD         | De novo                  | P                  | het.     |          |
